# Supplementary material for: Peripheral Blood Lymphocyte Phenotype Differentiates Secondary Antibody Deficiency in Rheumatic Disease from Primary Antibody Deficiency
Source: PubMed Central journal article supplement (PMC7230453; doi:10.3390/jcm9041049), 2020-04-07
Supplement: jcm-09-01049-s001.pdf [file jcm-09-01049-s001.pdf]

## Supplementary file

# Peripheral blood lymphocyte phenotype differentiates secondary antibody deficiency in rheumatic disease from primary antibody deficiency

Alexandra Jablonka <sup>†</sup>, Haress Etemadi <sup>†</sup>, Ignatius Ryan Adriawan, Diana Ernst, Roland Jacobs, Sabine Buyny, Torsten Witte, Reinhold Ernst Schmidt, Faranaz Atschekzei <sup>†,\*</sup> and Georgios Sogkas <sup>†,\*</sup>

Department of Rheumatology and Immunology, Hannover Medical School, 30625, Hannover; Jablonka.Alexandra@mh-hannover.de (A. J.); Etemadi.Haress@mh-hannover.de (H.E.); Adriawan.Ignatius@mh-hannover.de (I. A.); Ernst.Diana@mh-hannover.de (E.D.); Jacobs.Roland@mh-hannover.de (R.J.); Buyny.Sabine@mh-hannover.de (S.B.); Reinhold.Ernst.Schmidt@mh-hannover.de (R. S.); Torsten.Witte@mh-hannover.de (T.W.); Atschekzei.Faranaz@mh-hannover.de (F.A.); Sogkas.Georgios@mh-hannover.de (G.S.)

\* Correspondence: sogkas.georgios@mh-hannover.de; Tel.: (+49-(0)-511-532-3799) (G.S.), Atschekzei.faranaz@mh-hannover.de; Tel.: (+49-(0)-511-532-3871) (F.A.)

<sup>†</sup> These authors contributed equally

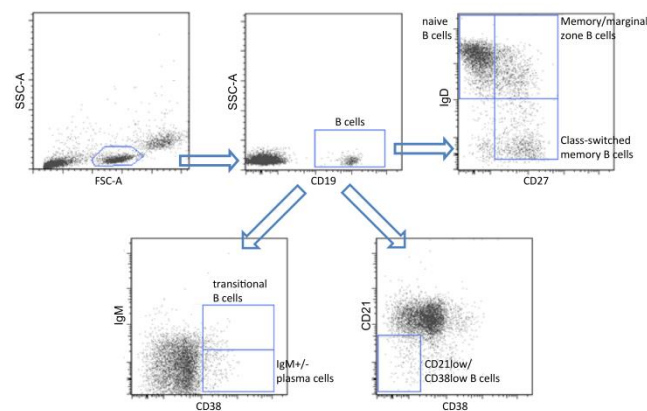

**Figure S1.** Strategy to measure B cell subsets. After doublet exclusion (not shown) and gating on lymphocytes based on SSC and FSC, we selected CD19<sup>+</sup> B cells with subsequent gating based on IgD, IgM, CD27 and CD38 expression, as indicated.

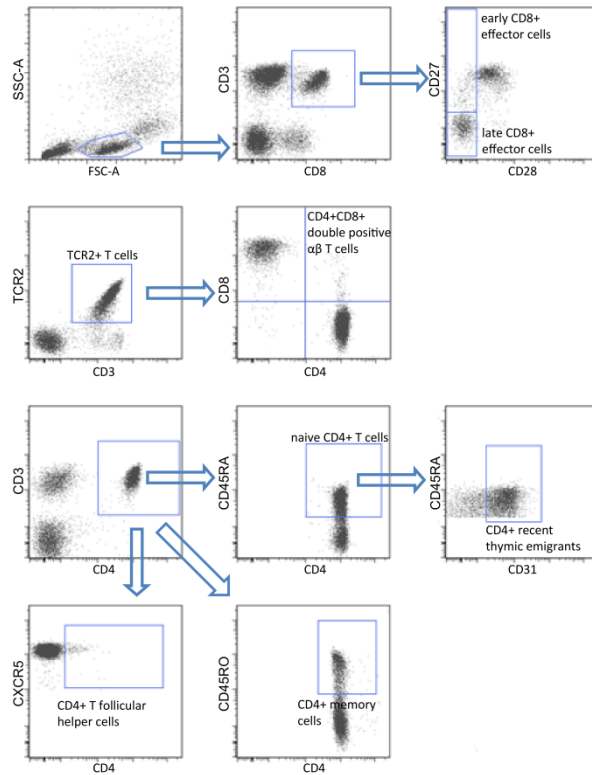

**Figure S2.** Strategy to measure T cell subsets. After doublet exclusion (not shown) and gating on lymphocytes based on SSC and FSC, we selected CD3<sup>+</sup> T cells with subsequent gating based on TCR2, CD4, CD8, CD27, CD28, CXCR5, CD45RA and CD45RO expression.

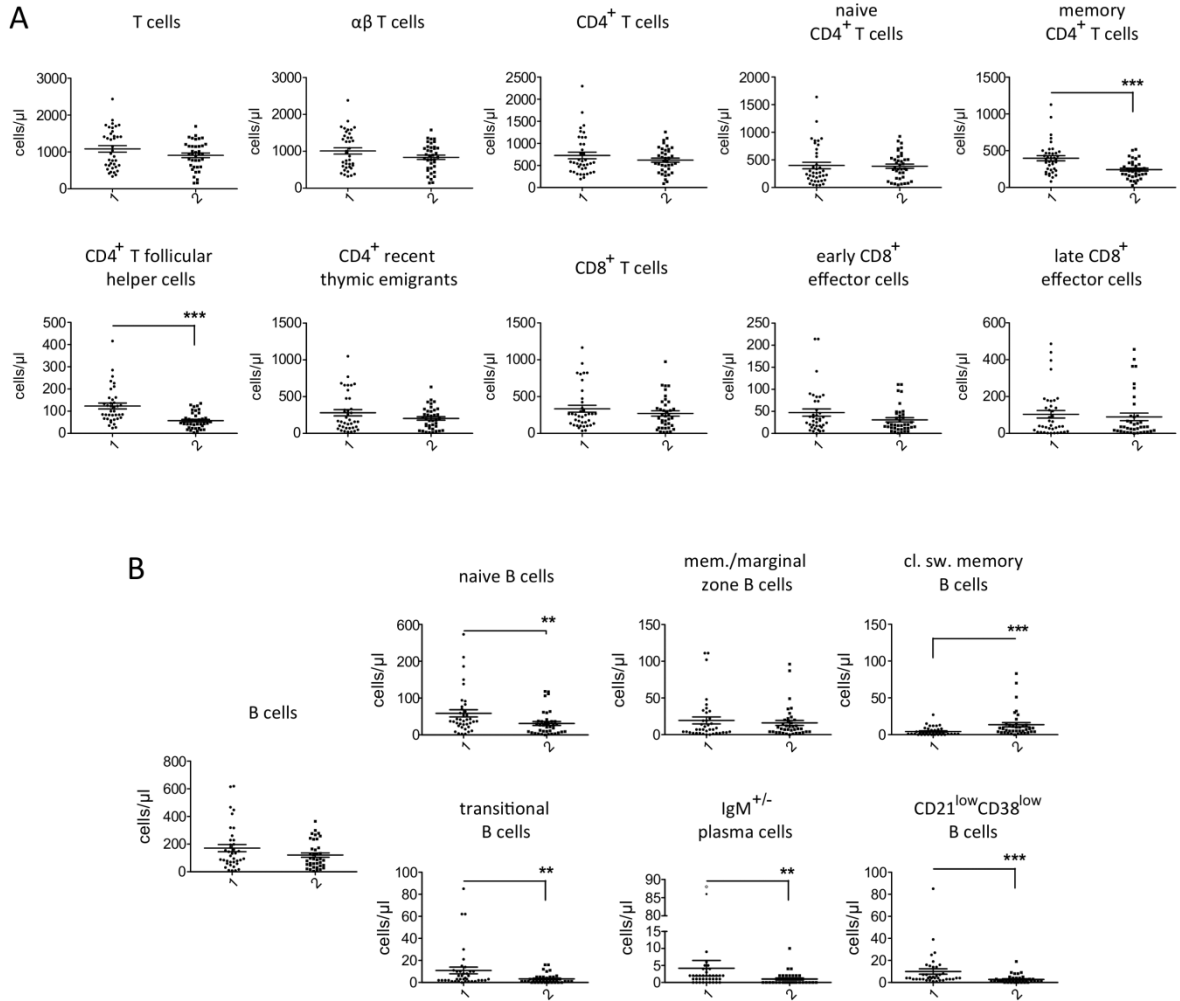

**Figure S3.** Comparison of absolute T cell (A) and B cell subset counts (B) in patients with primary (1, n=38) and secondary hypogammaglobulinemia (2, n=38 for T cell subsets and n=37 for B cell subsets, as a patient's (pat.nr. 37) B cells could not be differentiated due to their low number; \* $p < 0.05$ ; \*\* $p < 0.01$ ; \*\*\* $p < 0.001$ ).

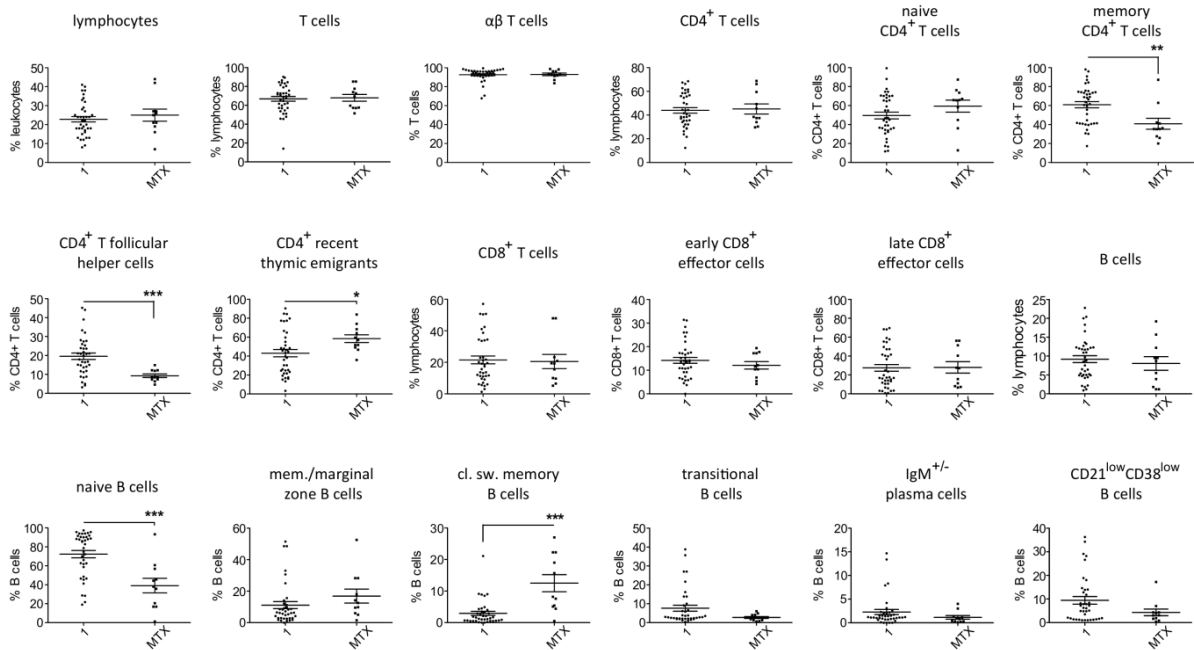

**Figure S4.** Comparison of B and T cell subsets in patients with primary (1, n=38) and secondary hypogammaglobulinemia due to methotrexate (MTX, n=11; \* $p < 0.05$ ; \*\* $p < 0.01$ ; \*\*\* $p < 0.001$ ).

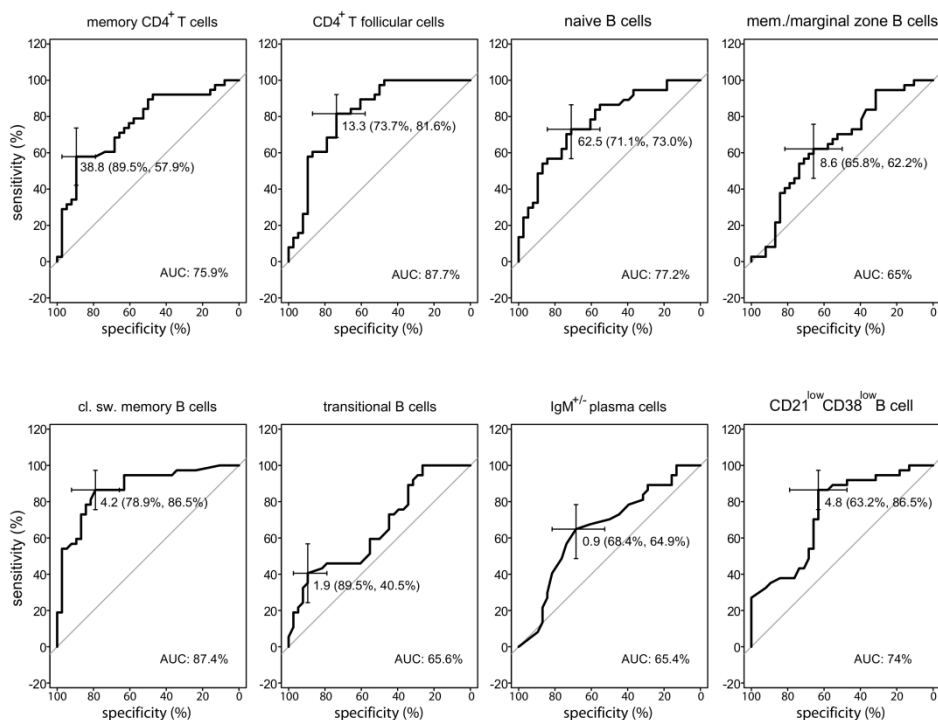

**Figure S5.** Receiver operating characteristic (ROC) curves and the corresponding area under the curve (AUC) values for the indicated B or T subset counts.

**Table S1.** Association of lymphocyte subset percentage counts with immunoglobulin values in patients with primary (1) and secondary (2) hypogammaglobulinemia.

| memory CD4 <sup>+</sup> T cells (% CD4 <sup>+</sup> T cells)     |                              |                              |
|------------------------------------------------------------------|------------------------------|------------------------------|
|                                                                  | 1                            | 2                            |
| IgG                                                              | -0.295 (-56.85 - 3.7) / ns   | -0.027 (-35.23 - 30.43) / ns |
| IgA                                                              | -0.033 (-35.8 - 29.83) / ns  | 0.165 (-17.27 - 46.83) / ns  |
| IgM                                                              | -0.043 (-36.62 - 28.97) / ns | 0.105 (-23.16 - 41.9) / ns   |
| CD4 <sup>+</sup> T follicular cells (% CD4 <sup>+</sup> T cells) |                              |                              |
|                                                                  | 1                            | 2                            |
| IgG                                                              | -0.172 (-47.35-16.63) / ns   | -0.175 (-47.64 - 16.26) / ns |
| IgA                                                              | -0.043 (-36.68 - 28.92) / ns | -0.054 (-37.58 - 27.95) / ns |
| IgM                                                              | -0.051 (-37.36 - 28.2) / ns  | 0.134 (-20.37 - 44.28) / ns  |
| mem./marginal zone B cells                                       |                              |                              |
|                                                                  | 1                            | 2                            |
| IgG                                                              | 0.375 (5.28 - 62.62) / *     | -0.03 (-35.97 - 30.56) / ns  |
| IgA                                                              | 0.248 (-8.79 - 53.29) / ns   | 0.252 (-8.8 - 54) / ns       |

|     |                            |                            |
|-----|----------------------------|----------------------------|
| IgM | 0.464 (15.96 - 68.75) / ** | 0.123 (-21.89 - 43.8) / ns |
|-----|----------------------------|----------------------------|

naïve B cells (% B cells)

|     | 1                            | 2                             |
|-----|------------------------------|-------------------------------|
| IgG | -0.286 (-56.19 - 0.047) / ns | -0.312 (-58.4 - 2.24) / ns    |
| IgA | -0.262 (-54.36 - 7.3) / ns   | -0.513 (-72.22 - -21.65) / ** |
| IgM | -0.409 (-65.02 - -9.3) / *   | -0.026 (-35.57 - 30.99) / ns  |

cl. sw. memory B cells (% B cells)

|     | 1                          | 2                           |
|-----|----------------------------|-----------------------------|
| IgG | 0.324 (-0.54 - 58.95) / *  | 0.395 (7.13 - 64.33) / *    |
| IgA | 0.325 (-0.4 - 59.05) / *   | 0.489 (18.61 - 70.67) / **  |
| IgM | 0.263 (-7.22 - 54.41) / ns | 0.074 (-26.59 - 39.68) / ns |

transitional B cells (% B cells)

|     | 1                            | 2                            |
|-----|------------------------------|------------------------------|
| IgG | 0.119 (-21.82 - 43.06) / ns  | 0.156 (-18.68 - 46.47) / ns  |
| IgA | 0.101 (-23.5 - 41.6) / ns    | 0.172 (-17.04 - 47.79) / ns  |
| IgM | -0.018 (-34.49 - 31.19) / ns | -0.171 (-47.72 - 17.13) / ns |

IgM<sup>+</sup> plasma cells (% B cells)

|     | 1                           | 2                           |
|-----|-----------------------------|-----------------------------|
| IgG | -0.079 (-39.7 - 25.64) / ns | 0.122 (-22 - 43.71) / ns    |
| IgA | 0.073 (-26.18 - 39.21) / ns | 0.006 (-32.72 - 33.87) / ns |
| IgM | 0.088 (-24.76 - 40.49) / ns | 0.023 (31.15 - 35.4) / ns   |

CD21<sup>low</sup>CD38<sup>low</sup> B cells (% B cells)

|     | 1                           | 2                            |
|-----|-----------------------------|------------------------------|
| IgG | -0.278 (-55.57 - 0.57) / ns | 0.09 (-25.09 - 41.03) / ns   |
| IgA | -0.06 (-38.06 - 27.43) / ns | 0.092 (-24.89 - 41.2) / ns   |
| IgM | 0.062 (-27.2 - 38.28) / ns  | -0.008 (-34.01 - 32.58) / ns |

(Spearman' s r(95% c.i.)/p-value)

**Table S2.** lymphocyte subset counts of patients with PID on anti-inflammatory regiments.

| Pat. Nr. | Memory CD4 <sup>+</sup> T cells (% CD4 <sup>+</sup> T cells) | CD4 <sup>+</sup> T follicular helper cells (% CD4 <sup>+</sup> T cells) | Naïve B cells (% B cells) | Mem./ marginal zone B cells (% B cells) | cl. sw. memory B cells (% B cells) | Transitional B cells (% B cells) | IgM <sup>+</sup> plasma cells (% B cells) | CD21 <sup>low</sup> B cells (% B cells) | Indication    | Therapy             |
|----------|--------------------------------------------------------------|-------------------------------------------------------------------------|---------------------------|-----------------------------------------|------------------------------------|----------------------------------|-------------------------------------------|-----------------------------------------|---------------|---------------------|
| 1        | 83.5                                                         | 21.1                                                                    | 94                        | 1.3                                     | 0.5                                | 13.8                             | 0.4                                       | 18                                      | GLILD         | AZA                 |
| 7        | 74.1                                                         | 23.6                                                                    | 90.4                      | 8.3                                     | 0.5                                | 2.2                              | 1.1                                       | 4.8                                     | PsA           | MTX                 |
| 14       | 40.6                                                         | 15.1                                                                    | 97.4                      | 1.8                                     | 0                                  | 35.7                             | 1.4                                       | 1.4                                     | GLILD         | Prednisolone (5 mg) |
| 20       | 75.4                                                         | 13.7                                                                    | 85.4                      | 4.2                                     | 2.1                                | 2.1                              | 0.1                                       | 6.2                                     | IBD (Crohn's) | MSZ + prednisolone  |

|    |      |      |      |     |     |     |     |      |        |        |
|----|------|------|------|-----|-----|-----|-----|------|--------|--------|
|    |      |      |      |     |     |     |     |      | like)  | (5 mg) |
| 21 | 71.7 | 25.3 | 19   | 1.1 | 0.1 | 1.3 | 1.4 | 13.9 | GLILD  | AZA    |
| 25 | 34.4 | 33.3 | 91.5 | 4.2 | 2.1 | 2.1 | 4.2 | 2.1  | perSpA | MTX    |

AZA, azathioprine; GLILD, *Granulomatous-lymphocytic interstitial lung disease*; IBD, inflammatory bowel disease; MSZ, mesalazine; MTX, methotrexate; pat. nr., patient number; perPsA, periphere spondyloarthritis; PsA, psoriasis arthritis
